# Supplementary material for: IL6 and CRP haplotypes are associated with COPD risk and systemic inflammation: a case-control study
Source: PubMed Central journal article supplement (PMC2660301; doi:10.1186/1471-2350-10-23), 2009-03-09
Supplement: 1471-2350-10-23-S5.pdf [file 1471-2350-10-23-S5.pdf]

**Table S4**

Association of *IL6*, *CRP* and *FBG* tagSNPs and multivariable adjusted CRP, IL-6 and fibrinogen levels in COPD patients

| SNP              | Ln(IL6)*                |          | Ln (CRP) †               |          | Ln (Fibrinogen) ‡        |          |
|------------------|-------------------------|----------|--------------------------|----------|--------------------------|----------|
|                  | Difference (95%CI)      | P- value | Difference (95%CI)       | P- value | Difference (95%CI)       | P- value |
| <i>IL6</i>       |                         |          |                          |          |                          |          |
| rs2069825        | 0.03<br>(-0.08 - 0.14)  | 0.56     | 0.01<br>(-0.16 - 0.18)   | 0.9      | 0.02<br>(0.00 - 0.05)    | 0.08     |
| rs2069827        | -0.01<br>(-0.21 - 0.19) | 0.93     | 0.11<br>(-0.20 - 0.43)   | 0.49     | 0.03<br>(-0.02 - 0.07)   | 0.2      |
| rs1800797        | 0.04<br>(-0.06 - 0.15)  | 0.43     | 0.01<br>(-0.16 - 0.18)   | 0.9      | 0.03<br>(0.00 - 0.05)    | 0.03     |
| rs2069840        | -0.04<br>(-0.16 - 0.07) | 0.49     | 0.04<br>(-0.14 - 0.23)   | 0.64     | -0.01<br>(-0.04 - 0.01)  | 0.38     |
| rs1554606        | 0.02<br>(-0.09 - 0.13)  | 0.70     | -0.01<br>(-0.19 - 0.16)  | 0.87     | 0.02<br>(-0.01 - 0.04)   | 0.13     |
| rs2069861        | -0.04<br>(-0.22 - 0.15) | 0.70     | -0.32<br>(-0.62 - -0.03) | 0.03     | 0.01<br>(-0.04 - 0.05)   | 0.79     |
| rs1818879        | -0.01<br>(-0.13 - 0.10) | 0.81     | -0.08<br>(-0.25 - 0.10)  | 0.38     | -0.00<br>(-0.03 - 0.02)  | 0.81     |
| <i>CRP</i>       |                         |          |                          |          |                          |          |
| rs3091244<br>C/T | Not tested              |          | 0.18<br>(-0.00 - 0.36)   | 0.056    | Not tested               |          |
| rs3091244<br>C/A | Not tested              |          | 0.37<br>(0.06 - 0.69)    | 0.021    | Not tested               |          |
| rs1800947        | Not tested              |          | -0.35<br>(-0.67 - -0.02) | 0.037    | Not tested               |          |
| rs1130864        | Not tested              |          | 0.18<br>(-0.01 - 0.36)   | 0.062    | Not tested               |          |
| rs1205           | Not tested              |          | -0.08<br>(-0.25 - 0.10)  | 0.39     | Not tested               |          |
| rs2808630        | Not tested              |          | -0.20<br>(-0.38 - -0.01) | 0.038    | Not tested               |          |
| rs3090077        | Not tested              |          | 0.33<br>(-0.02 - 0.67)   | 0.063    | Not tested               |          |
| <i>FBG</i>       |                         |          |                          |          |                          |          |
| rs1800791        | Not tested              |          | Not tested               |          | -0.01<br>(-0.04 - 0.03)  | 0.74     |
| rs1800788        | Not tested              |          | Not tested               |          | -0.03<br>(-0.06 - -0.00) | 0.03     |
| rs1800787        | Not tested              |          | Not tested               |          | 0.01<br>(-0.02 - 0.05)   | 0.36     |
| rs2227421        | Not tested              |          | Not tested               |          | 0.02<br>(-0.00 - 0.05)   | 0.11     |

\*Linear regression analysis for outcome ln(IL-6) were adjusted for age, sex and 6MWD

†Linear regression analysis for outcome ln(CRP) were adjusted for age, sex, BMI and 6MWD

‡Linear regression analysis for outcome ln(fibrinogen) were adjusted for age, sex and 6MWD
